# Supplementary material for: SGLT2 inhibitors activate pantothenate kinase in the human heart
Source: PubMed Central journal article supplement — bioRxiv. 2024 Jul 27:2024.07.26.605401. Preprint. [Version 1] doi: 10.1101/2024.07.26.605401 (PMC11291109; doi:10.1101/2024.07.26.605401), 2024-07-27
Supplement: media-1.pdf [file media-1.pdf]

**Supplementary data for:**

## **SGLT2 inhibitors activate pantothenate kinase in the human heart**

Nicholas Forelli<sup>1</sup>, Deborah Eaton<sup>1</sup>, Jiten Patel<sup>1</sup>, Caitlyn E. Bowman<sup>1</sup>, Ryo Kawakami<sup>1</sup>, Ivan A. Kuznetsov<sup>1</sup>, Kristina Li<sup>1</sup>, Claire Brady<sup>1</sup>, Kenneth Bedi<sup>1</sup>, Yijun Yang<sup>1</sup>, Kaustubh Koya<sup>1</sup>, Emily Megill<sup>2</sup>, Daniel S. Kanter<sup>2</sup>, Louis Smith<sup>3</sup>, Gregory R. Bowman<sup>3</sup>, Nathaniel Snyder<sup>2</sup>, Jonathan Edwards<sup>4</sup>, Kenneth Margulies<sup>1</sup>, Zoltan Arany<sup>1</sup>

<sup>1</sup>Cardiovascular Institute, Perelman School of Medicine, University of Pennsylvania, Philadelphia, PA

<sup>2</sup>Aging & Cardiovascular Discovery Center, Department of Cardiovascular Sciences, Lewis Katz School of Medicine at Temple University, Philadelphia, PA

<sup>3</sup>Departments of Biochemistry & Biophysics and Bioengineering, Perelman School of Medicine, University of Pennsylvania, Philadelphia, PA

<sup>4</sup>Division of Cardiology, Children's Hospital of Philadelphia, Philadelphia, PA

Correspondence:

Zoltan Arany, MD PhD  
TRC 11-106  
Perelman School of Medicine  
Philadelphia, PA, 19104  
zarany@pennmedicine.upenn.edu

## Supplementary Table

### Human Patient Characteristics

| Sample | Etiology   | Sex | Age | LV Mass Index | BMI   | LVEF | Experiment             |
|--------|------------|-----|-----|---------------|-------|------|------------------------|
| 1      | NICM       | M   | 49  | 125.74        | 23.03 | 17.5 | Figure 1               |
| 2      | HCM        | M   | 31  | 116.82        | 30.46 | 15   | Figure 1               |
| 3      | ICM        | F   | 44  | 207.32        | 31.96 | 30   | Figure 1               |
| 4      | NICM       | M   | 52  | 150.38        | 32.82 | 15   | Figure 1               |
| 5      | NICM       | F   | 46  | 97.98         | 22.03 | 10   | Figure 1               |
| 6      | NICM       | F   | 26  | 77.66         | 22.58 | 15   | Figure 1               |
| 7      | Sarcoid    | M   | 61  | 125           | 29.06 | 20   | Figure 1,<br>Figure 2b |
| 8      | NICM       | F   | 68  | 122.23        | 24.44 | 27.5 | Figure 1               |
| 9      | HFpEF      | M   | 62  | 106.48        | 25.14 | 57.5 | Figure 1               |
| 10     | ARCV       | F   | 61  | 127.99        | 24.09 | 70   | Figure 1               |
| 11     | NICM       | M   | 59  | 147.97        | 32.77 | 10   | Figure 1,<br>Figure 2b |
| 12     | HFpEF      | M   | 61  | 133.18        | 34.34 | 55   | Figure 2b              |
| 13     | HFpEF      | M   | 58  | 117.79        | 22.40 | 55   | Figure 2b              |
| 14     | Sarcoid    | M   | 59  | 139.33        | 37.22 | 30   | Figure 2b              |
| 15     | Congenital | F   | 7   |               | 19.13 |      | Figure 2b              |
| 16     | NF         | F   | 56  | 111.38        | 25.22 | 55   | Figure 2c              |
| 17     | NF         | F   | 56  | 98.39         | 20.70 | 70   | Figure 2c              |
| 18     | NF         | F   | 69  | 139.48        | 33.50 | 52.5 | Figure 2c              |
| 19     | NF         | F   | 61  | 116.12        | 30.43 | 57   | Figure 2c              |
| 20     | NF         | F   | 54  | 114.71        | 36.11 | 55   | Figure 2c              |
| 21     | NF         | M   | 62  | 1411.62       | 23.66 | 65   | Figure 2c              |
| 22     | NF         | M   | 58  | 77.33         | 23.66 | 65   | Figure 2c              |
| 23     | NF         | M   | 20  | 141.62        | 23.66 | 65   | Figure 2c              |
| 24     | NICM       | F   | 46  | 97.98         | 24.03 | 10   | Figure 2c              |
| 25     | NICM       | M   | 28  | 169           | 30.52 | 12   | Figure 2c              |
| 26     | Sarcoid    | M   | 61  | 125           | 29.06 | 20   | Figure 2c              |
| 27     | NICM       | M   | 49  | 125.74        | 23.03 | 17.5 | Figure 2c              |
| 28     | HCM        | M   | 59  | 116.82        | 30.48 | 15   | Figure 2c              |
| 29     | NICM       | F   | 26  | 77.66         | 22.58 | 15   | Figure 2c              |
| 30     | NICM       | M   | 59  | 147.92        | 32.77 | 10   | Figure 2c              |
| 31     | NICM       | F   | 68  | 12.23         | 24.44 | 27.5 | Figure 2c              |
| 32     | NICM       | M   | 52  | 150.35        | 32.82 | 15   | Figure 2c              |
| 33     | ICM        | F   | 53  | 106.59        | 28.52 | 59   | Figure 2c              |
| 34     | Sarcoid    | M   | 59  | 139.33        | 37.22 | 30   | Figure 2c              |

Supplementary Figures

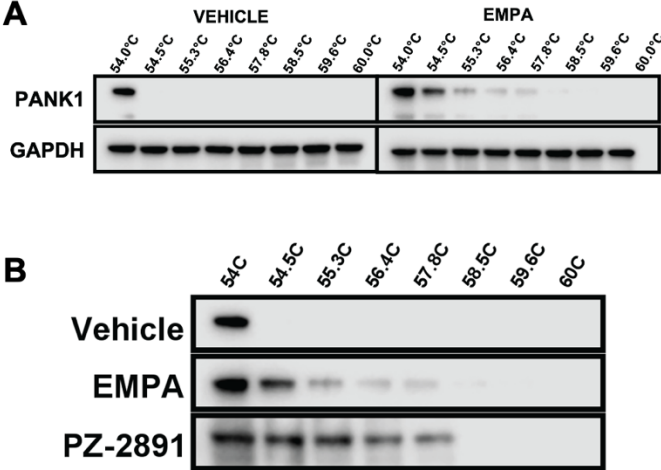

**Supplementary figure 1. A,** CETSA of PANK1 from HepG2 cells treated with 10uM Empagliflozin. **B,** CETSA of PANK1 from HEK293 cells treated with vehicle (0.01% DMSO), 10uM Empagliflozin, or 10uM PZ-2891.

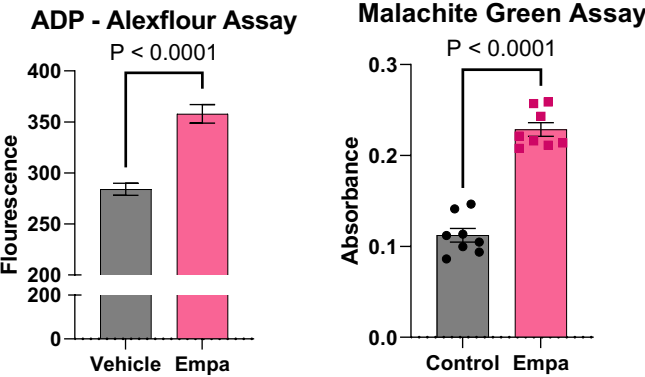

**Supplementary Figure 2.** Single-point enzyme activity assays of PANK1 utilizing 2 different kinase activity assays with 1uM of EMPA *in vitro*. Left: Transcreeener ADP Assay (Bellbrook labs) Kit single point kinase activity assay.<sup>1</sup> Right: Malachite green-coupled ADP detection single point kinase activity assay.

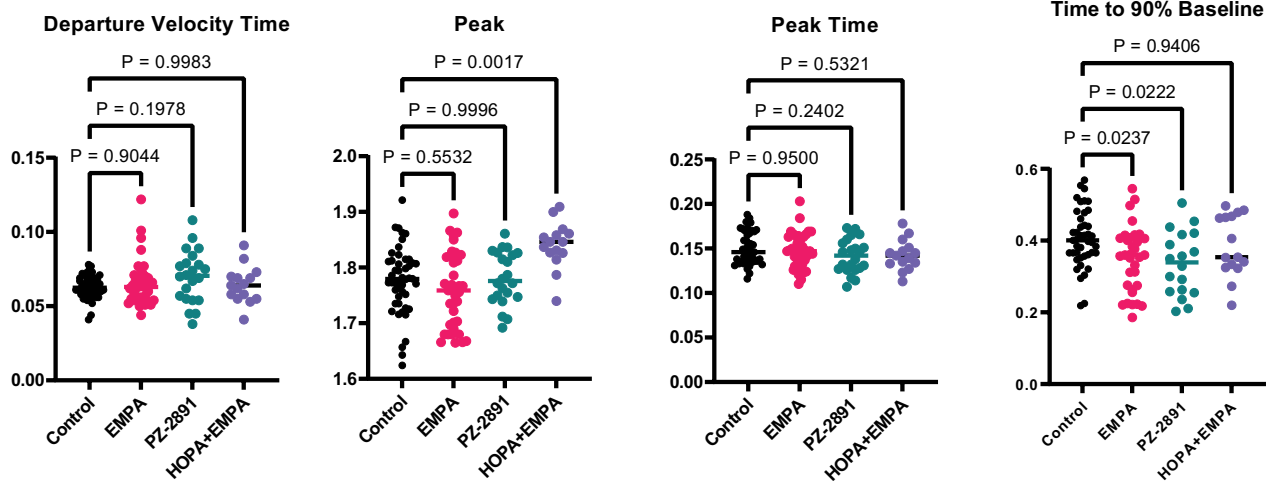

**Supplementary Figure 3.** Additional contractility parameters, accompanying Figure 4.
